# Supplementary material for: HP1 Recruitment in the Absence of Argonaute Proteins in Drosophila
Source: PLoS Genet. 2010 Mar 12;6(3):e1000880. doi: 10.1371/journal.pgen.1000880 (PMC2837403; doi:10.1371/journal.pgen.1000880)
Supplement: Text S1 — Detailed ChIP protocol. (0.03 MB DOC) [file pgen.1000880.s011.doc]

**Supplementary information for**

**HP1 recruitment in the absence of Argonaute proteins in *Drosophila***

Nellie Moshkovichand Elissa P. Lei

**Detailed ChIP protocol**

**Crosslinking and sonication**

Wildtype (Oregon-R) heads or ovaries were dissected on dry ice. Fly heads/ovaries were washed in 5 ml PBS containing 0.01% Triton X-100 and centrifuged for 1 min at 500 rcf to pellet heads. Supernatant was discarded, and 1 ml of crosslinking solution (50 mM HEPES, pH 8.0, 1 mM EDTA, 0.5 mM EGTA, 100 mM NaCl, and 1.8% formaldehyde) and 3 mL n−heptane were added. The mixture was shaken vigorously for 20 min at room temperature. Supernatant was discarded, and heads were resuspended in 5 ml PBS containing 125 mM glycine and 0.01% Triton X-100. The mixture was shaken for 5 min at room temperature. Supernatant was discarded after centrifugation, and 5 ml of ice cold PBS containing 0.01% Triton X-100 was added. Supernatant was removed and heads were resuspended in 5 ml ice cold PBS containing 0.01%Triton X-100 and protease inhibitors (Roche). Heads were Dounce homogenized with pestle A (Kontes) for tissue disaggregation and complete homogenization. The mixture was centrifuged at 400 rcf for 1 min, and supernatant was transferred to a fresh tube. Supernatant was centrifuged at 9190 rcf for 5 min at 4°C and supernatant discarded afterwards. The pellet was resuspended in 5 ml ice cold Cell Lysis Buffer (5 mM PIPES, pH 8, 85 mM potassium chloride, 0.5% Nonidet P40 (NP40) and protease inhibitors). The mixture was Dounce homogenized with pestle B to release the cell nuclei and centrifuged at 9190 rcf for 5 min at 4°C. Supernatant was removed, and the pellet was resuspended in 1 ml of ice cold Nuclear Lysis Buffer (50 mM Tris HCl, pH 8.0, 10 mM EDTA, 1% SDS and protease inhibitors) and incubated for 20 min at 4°C. Then 0.5 ml ice cold IP dilution buffer (0.01% SDS, 1% Triton X-100, 1.2 mM EDTA pH 8.0, 16.7 mM Tris.HCl, pH 8.0, 167 mM NaCl and protease inhibitors) and 0.3 g of acid washed 212−300 micron glass beads (Sigma) was added. The mixture was sonicated in ice water 8 times for 30 s with 30 s intervals, transferred to microfuge tubes and centrifuged at 18407 rcf for 10 min at 4°C.

**Quality control of input chromatin**

100 l of chromatin was adjusted to 200 l with IP dilution buffer and decrosslinked at 65oC overnight. 2l of proteinase K at 20 mg/ml (Invitrogen) was added, and the mixture was incubated at 55oC for 2 h. Chromatin was extracted twice with equal volume of phenol:chloroform (Sigma) and once with chloroform (Sigma). 2 l of glycogen and one-tenth volume of 3M NaOAc, pH5.2 and 2.5 volumes of ethanol were added. The mixture was incubated for 30 min at -20°C, centrifuged and washed twice with 70% ethanol. The pellet was dissolved in 50 l water. Chromatin size was checked on a 1% agarose gel. DNA was quantified using Nanodrop ND1000 spectrophotometer.

**Preparation of Protein A beads**

rProtein A agarose beads (GE Healthcare) were washed with IP dilution buffer 3 times and blocked in IP dilution buffer containing 1% BSA rotating at 4°C overnight. Beads were washed three times in IP dilution buffer and resuspended in IP dilution buffer for later usage.

**Chromatin preclear**

Chromatin was diluted three to five times with IP dilution buffer (depending on the DNA concentration). 30 l of washed Protein A agarose beads were added to each fraction of diluted chromatin to be used in later immunoprecipitation and incubated at 4°C for 2 h.

**Immunoprecipitation**

Same volume of precleared chromatin was aliqouted for each IP sample. 3-5 l of antibodies were added to aliquoted chromatin and incubated rotating at 4°C overnight. 30 l of washed beads previously blocked with IP dilution buffer containing 1% BSA were added to each IP sample. The mixture was incubated at 4°C for 4 h. Chromatin-bound beads were centrifuged at 587 rcf for 2 min, and supernatant was discarded. Beads were washed three times with 1 mL Low salt wash buffer (0.1% SDS, 1.0% Triton X-100, 2.0 mM EDTA pH 8.0, 20 mM Tris.HCl, pH 8.0, 150 mM NaCl), three times with High salt wash buffer (0.1% SDS, 1.0% Triton X-100, 2.0 mM EDTA, pH 8.0, 20 mM Tris.HCl, pH 8.0, 500 mM NaCl), and two times with LiCl buffer (4 M LiCl, 1 mM EDTA, pH 8.0, 10 mM Tris HCl, pH 8.0, 1% NP40, 1% SDC) for 5 min with rotation at RT and pelleted at 587 rcf for 2 min. Chromatin was eluted with 200 l of freshly prepared IP Elution Buffer (0.1 M NaHCO3, 1% SDS) at 65°C for 30 min. This step was repeated one more time. NaCl (5 M, 20l), EDTA (0.5 M, 8l), Tris (1 M, pH 8.0, 16l) were added to 400 l of eluted chromatin and incubated overnight at 65oC. 4 l of Proteinase K at 20 mg/ml were added for 3 h at 55oC. Chromatin was extracted with phenol:chloroform and precipitated as described before. IP samples were dissolved in 50 l water.
